# Supplementary material
Source: publisher figshare collection journal article supplement (https://gsapubs.figshare.com/ndownloader/files/27069491)
Supplement: Supplementary file 1 [file 27069491]

## Sheet: log_fit
Arc	Sr/Y Median	Sr/Y St.Dev.	Km	St.Dev.		La/Yb Median	La/Yb St.Dev.	Km	St.Dev.		Reference
Aleutian	11.4	2.3	18.9	4.4		2.8	0.17	18.9	4.4		Zellmer,2008
C. America	15.6	2.6	28	7		5.96	2.13	28	7		Zellmer,2008
Cascades	24.8	9.4	38	1.9		7.7	2.37	38	1.9		Zellmer,2008
CVZ	56.5	18.5	65	0.7		22.57	9.51	65	0.7		Zellmer,2008
Guatemala	31.4	5.1	44	3		6.49	0.74	44	3		Lücke, 2014
Honshu	11.7	4	30.2	3.6		3.7	0.48	30.2	3.6		CRUST 1.0
Izu-Bonin	8.7	1.3	20.5	2.7		1.43	0.45	20.5	2.7		Zellmer,2008
Kamchatka	15.5	4.7	34.6	4.8		3.71	0.33	34.6	4.8		CRUST 1.0
Kurile	9.9	1.6	18.3	0.9		1.95	0.34	18.3	0.9		Zellmer,2008
L. Antilles	11.8	1.4	24.7	0.7		3.13	0.49	24.7	0.7		Zellmer,2008
Luzon	24	10.3	30.8	1.4		5.55	1.69	30.8	1.4		CRUST 1.0
Marianas	9.4	0.3	14.5	1		2.18	0.05	14.5	1		Zellmer,2008
Mexican	21.6	4.5	37.2	9		7.85	1.3	37.2	9		CRUST 1.0
NE Aleutian	29.6	0.6	40	3		4.73	0.14	40	3		Eberhart-Phillips et al., 2006
New Britain	9.5	1	27.1	4.3		2.54	0.54	27.1	4.3		CRUST 1.0
New Hebrides	20.1	5.6	25	3		3.61	0.85	25	3		Dimalanta et al., 2002
NVZ	43.4	11.2	54.4	4.7		9.54	2.95	54.4	4.7		CRUST 1.0
Ryukyu	18.2	3.5	24.5	3.4		2.78	0.39	24.5	3.4		Zellmer,2008
S. Sandwich	4.5	0.3	11.8	0.1		1.32	0.51	11.8	0.1		Zellmer,2008
S. Shetland	17.9	4.8	26.2	1.2		4.93	1.23	26.2	1.2		CRUST 1.0
Sulawesi	11.9	2.8	27.4	2.2		2.35	1.1	27.4	2.2		Zellmer,2008
Sunda	15.7	2.9	27.8	1.8		4.42	1.03	27.8	1.8		Zellmer,2008
SVZ	20.7	7.7	40	5		6.48	2	40	5		Yuan, 2006
*Tonga	10.5	10.4	20	3		1.21	0.16	20	3		Zellmer,2008
All data presented here were originally compiled by Profeta, L., Ducea, M. N., Chapman, J. B., Paterson, S. R., Gonzales, S. M. H., Kirsch, M., ... & DeCelles, P. G. (2015). Quantifying crustal thickness over time in magmatic arcs. Scientific reports, 5, 17786.
*Omitted due to high Sr/Y uncertainties resulting in taking the log of negative values in the Monte Carlo proxy calibration.
References
Dimalanta, C., Taira, A., Yumul Jr, G. P., Tokuyama, H., & Mochizuki, K. (2002). New rates of western Pacific island arc magmatism from seismic and gravity data. Earth and Planetary Science Letters, 202(1), 105-115.
Eberhart‐Phillips, D., Christensen, D. H., Brocher, T. M., Hansen, R., Ruppert, N. A., Haeussler, P. J., & Abers, G. A. (2006). Imaging the transition from Aleutian subduction to Yakutat collision in central Alaska, with local earthquakes and active source data. Journal of Geophysical Research: Solid Earth, 111(B11).
Laske, G., Masters., G., Ma, Z. and Pasyanos, M., Update on CRUST1.0 - A 1-degree Global Model of Earth's Crust, Geophys. Res. Abstracts, 15, Abstract EGU2013-2658, 2013.
Lücke, O. H. (2014). Moho structure of Central America based on three-dimensional lithospheric density modelling of satellite-derived gravity data. International Journal of Earth Sciences, 103(7), 1733-1745.
Model Crust 1.0 is from Laske et al database available at the following site accessed August 2015 http://igppweb.ucsd.edu/~gabi/crust1.html.
Yuan, X., Asch, G., Bataille, K., Bock, G., Bohm, M., Echtler, H., ... & Wolbern, I. (2006). Deep seismic images of the Southern Andes. Geological Society of America Special Paper, 407, 61.
Zellmer, G. F. (2008). Some first-order observations on magma transfer from mantle wedge to upper crust at volcanic arcs. Geological Society, London, Special Publications, 304(1), 15-31.
